# Supplementary material for: Physicochemical and functional characterization of pumpkin seed protein isolate
Source: Royal Society of Chemistry journal article supplement (doi:10.1039/d4fb00268g), 2025-01-01
Supplement: d4fb00268g1.pdf [file d4fb00268g1.pdf]

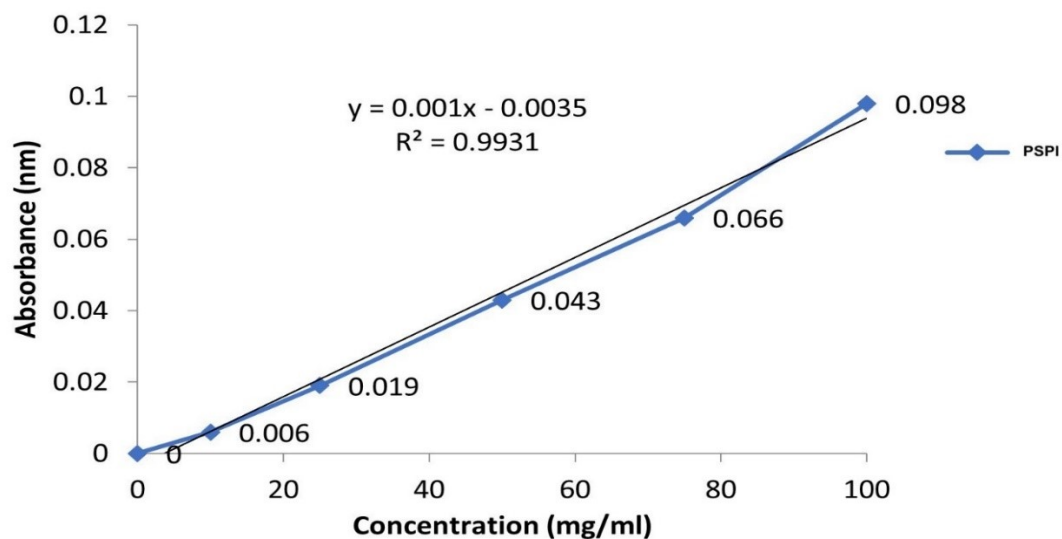

**Fig. S<sub>1</sub>: % DPPH Activity of PSPI**

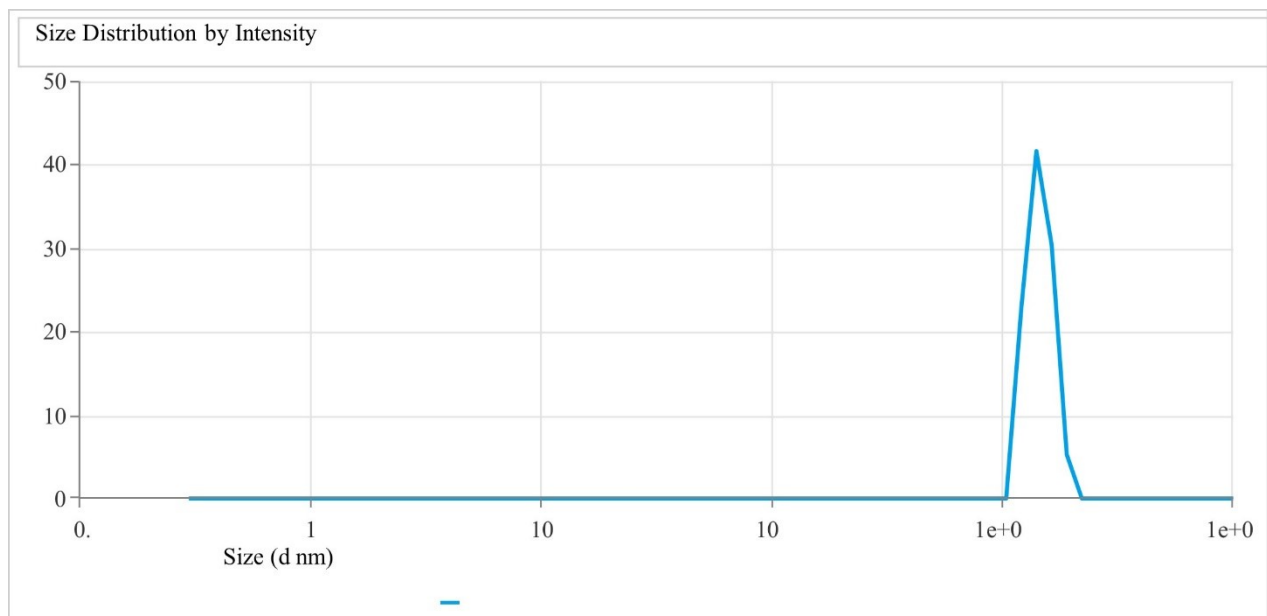

**Fig.S<sub>2</sub>: Particle Size distribution of PSPI**

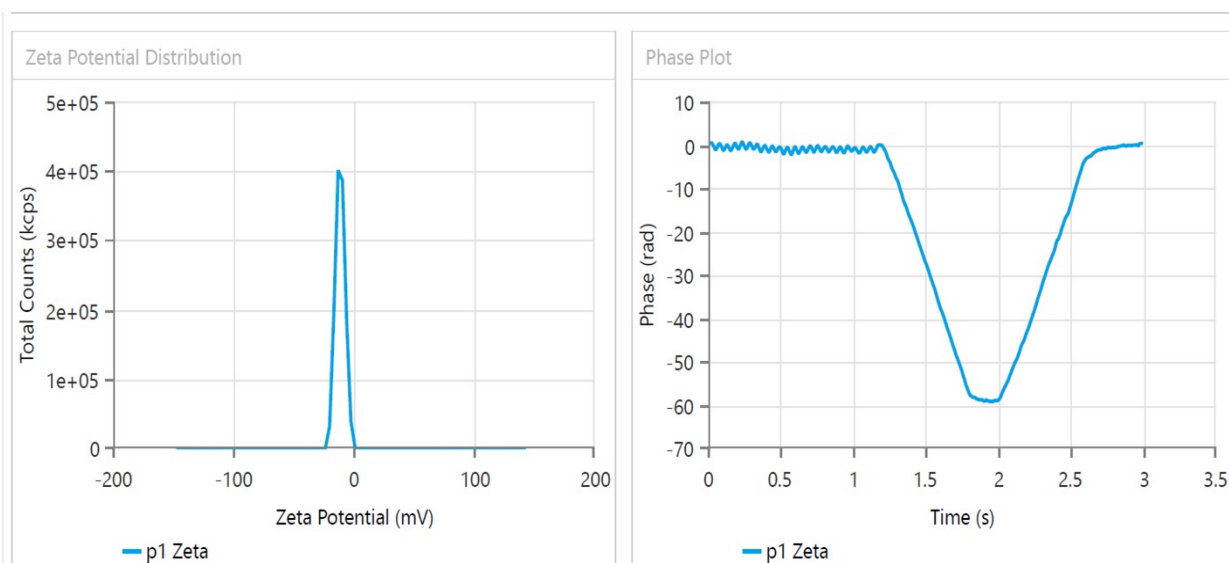

**Fig. S3: Zeta Potential of PSPI**
